# Supplementary figures and images for: Protective Effects of the Soluble Receptor for Advanced Glycation End‐Products on Pyroptosis during Myocardial Ischemia‐Reperfusion
Source: Hindawi journal article supplement (doi:10.1155/2021/9570971), 2021-01-01

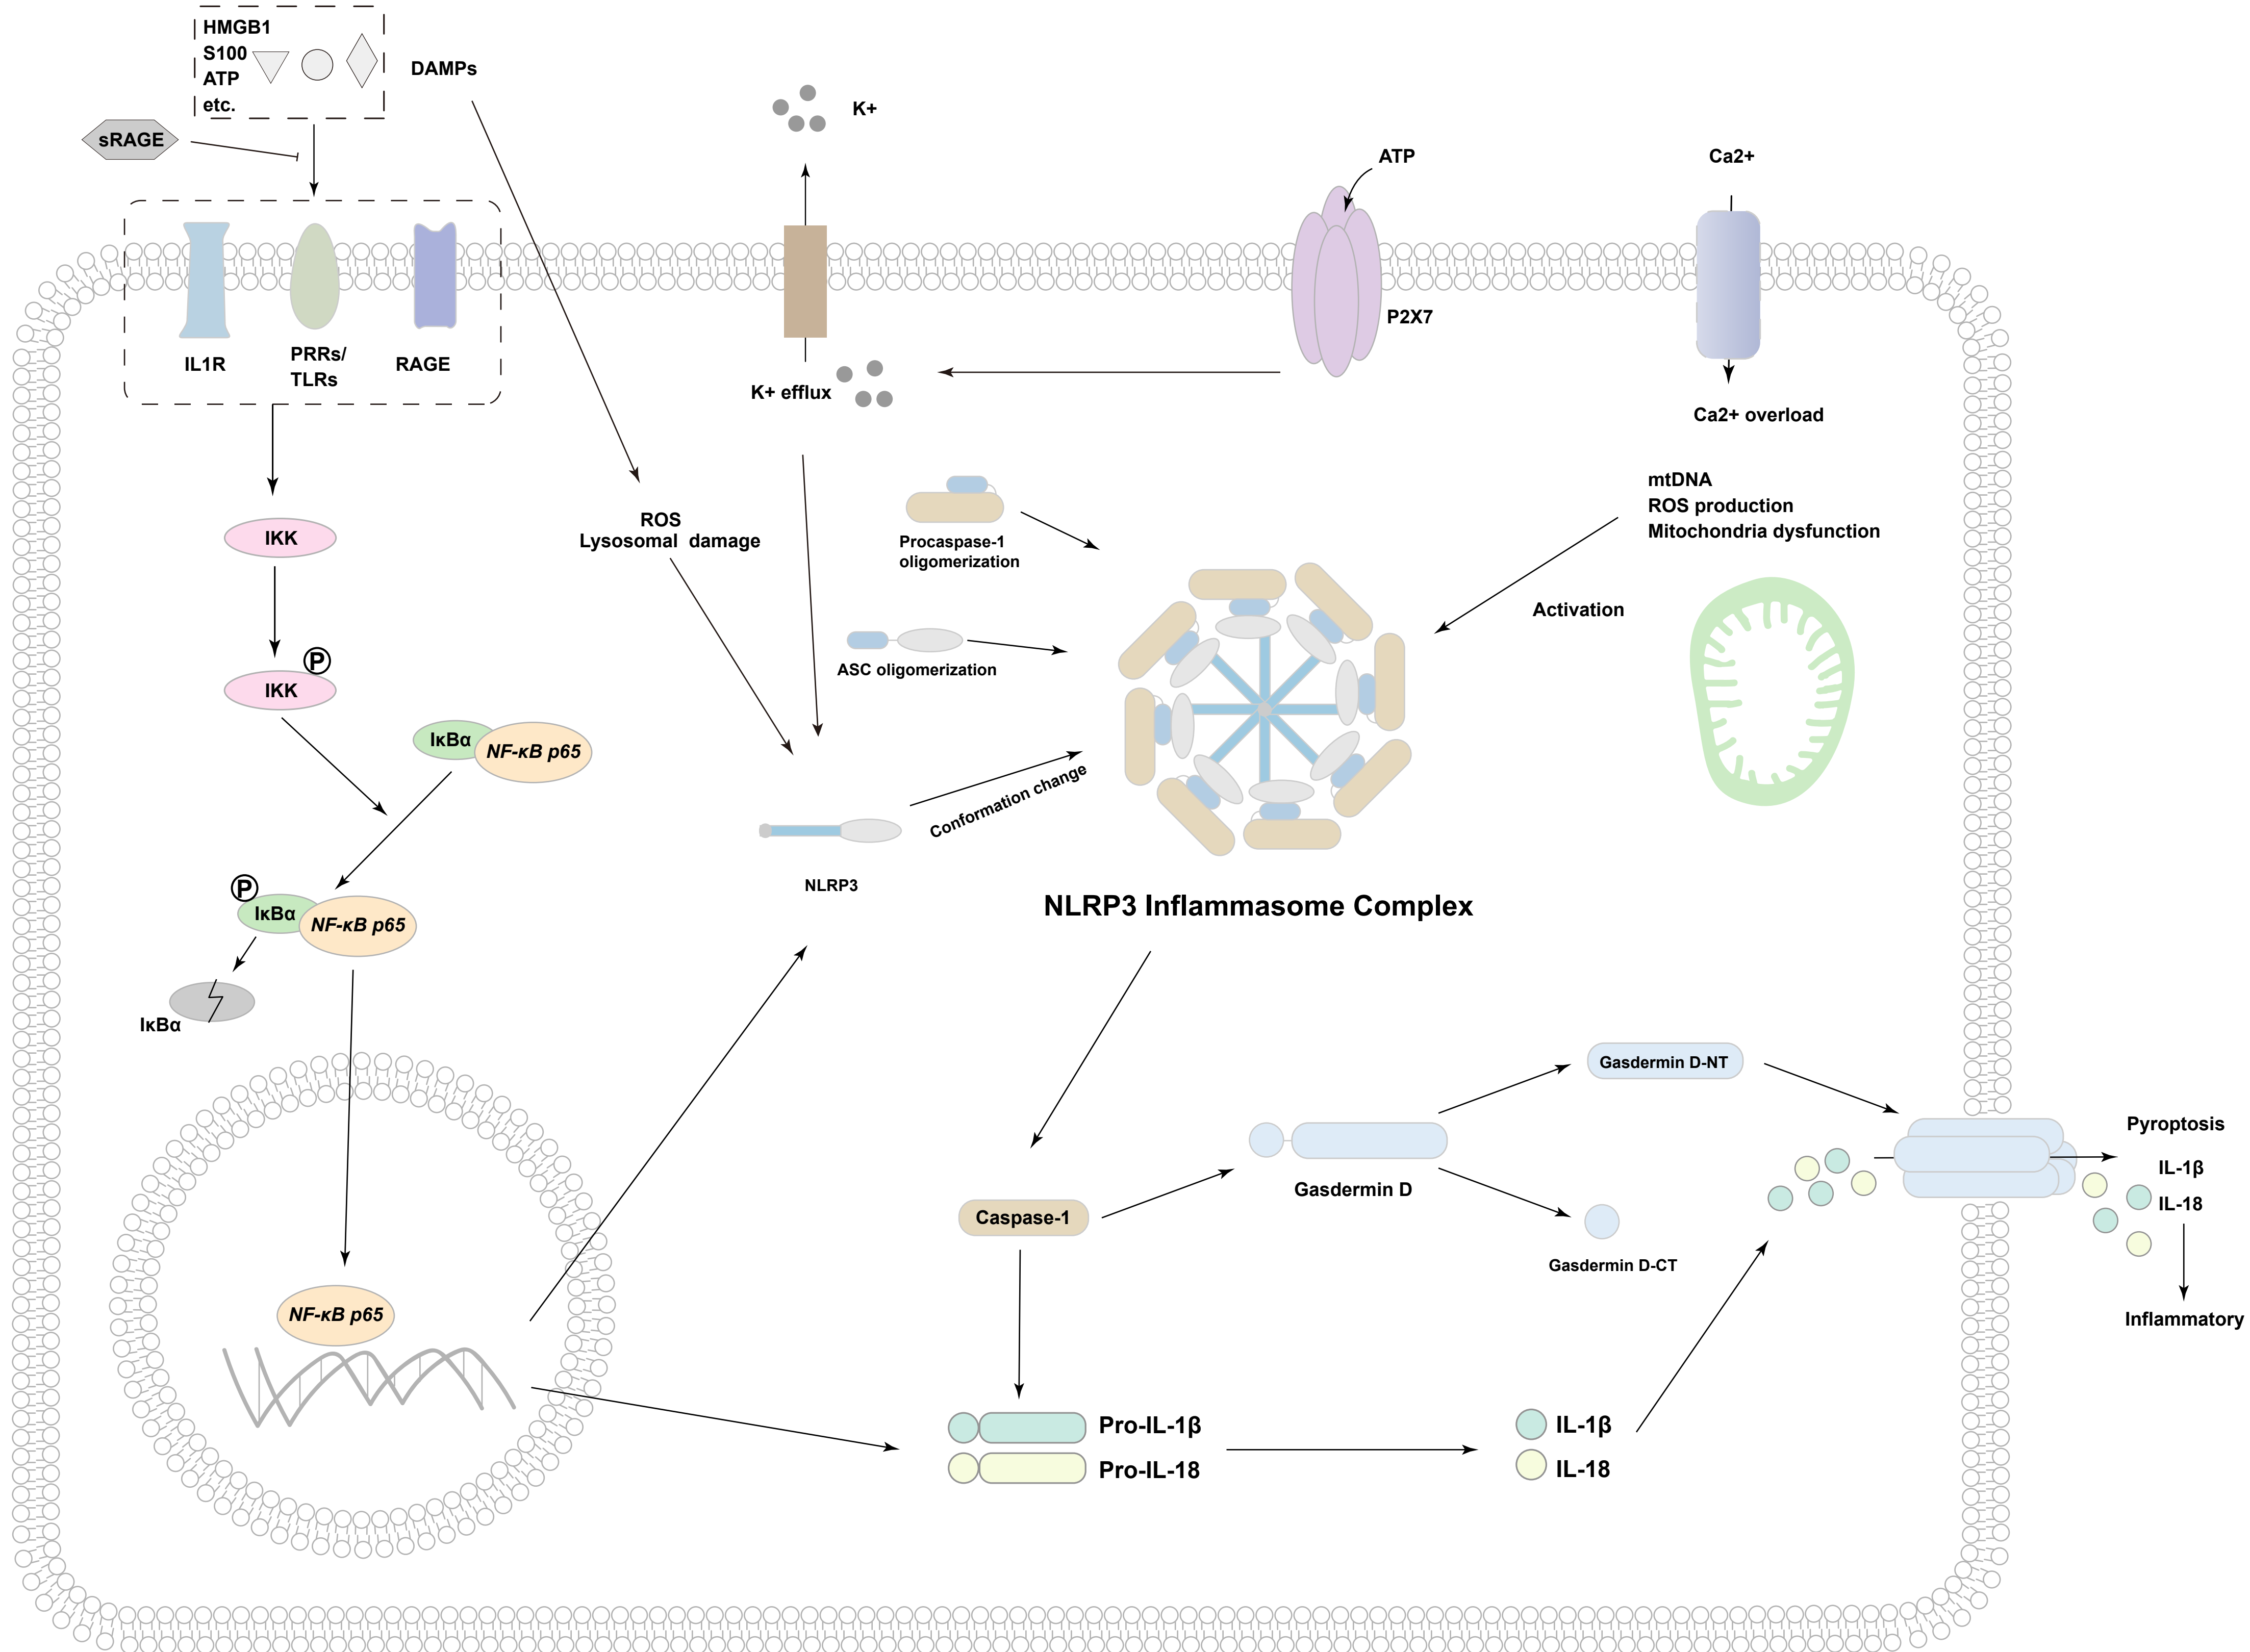

Supplement: f1 [file 9570971.f1.ai]
